# Supplementary material for: Interface contact and modulated electronic properties by in-plain strains in a graphene–MoS2 heterostructure
Source: Royal Society of Chemistry journal article supplement (doi:10.1039/d2ra07949f), 2023-01-01
Supplement: d2ra07949f1.pdf [file d2ra07949f1.pdf]

## Supplementary information of:

# Interface contact and modulated electronic properties by in-plane strains in graphene-MoS<sub>2</sub> heterostructure

Qian Wang<sup>1</sup>, Zhenjun Song<sup>2</sup>, Junhui Tao<sup>1</sup>, Haiqin Jin<sup>1</sup>, Sha Li<sup>1</sup>, Yuran Wang<sup>1</sup>, Yuejuan Liu<sup>3</sup>, and Lin Zhang<sup>1\*</sup>

<sup>1</sup>School of Physics and Mechanical & Electrical Engineering, Hubei Engineering Technology Research Center of Environmental Purification Materials, Hubei University of Education, Wuhan 430000, China,

<sup>2</sup> School of Pharmaceutical and Materials Engineering, Taizhou University, Taizhou 318000, PR China

<sup>3</sup>College of Physics and Engineering, Chengdu Normal University, Chengdu 611130, China

\* E-mail: zhanglin@hue.edu.cn

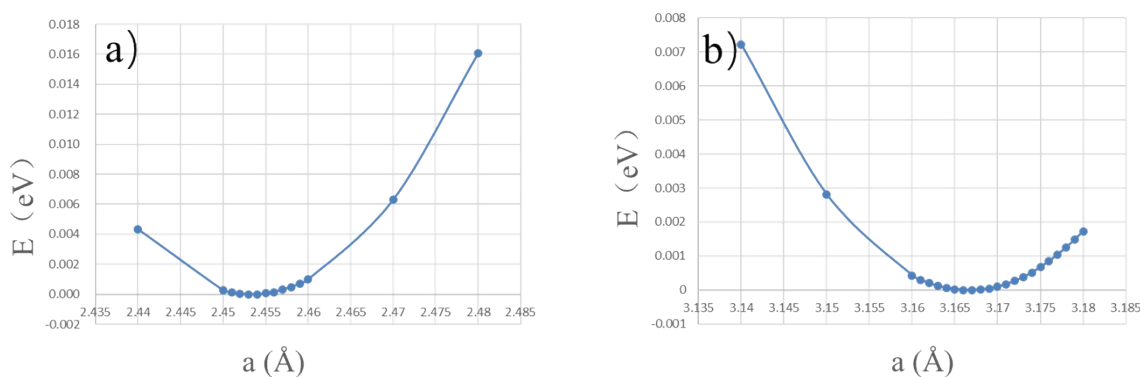

**FIG. S1.** Evolution of the total energy as a function of lattice parameter of (a) graphene and (b) MoS<sub>2</sub>, taking the origin at the lowest energy configuration.

Fig. S1 shows the total energy curves of isolated graphene and MoS<sub>2</sub> monolayer. As shown, the lattice parameter of graphene and MoS<sub>2</sub> are 2.454 Å and 3.167 Å.

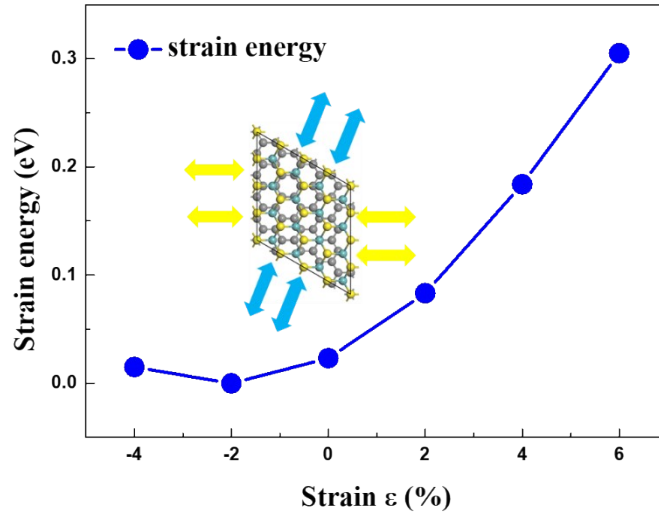

**FIG. S2.** The in-plane biaxial strain applied to Gr-MoS<sub>2</sub> heterojunction, and the relationship of strain energy with the biaxial strains.

The strain energy is checked here to ensure the strains considered are all within the elastic limit. The strain energy is given by the formula:  $E = (E_S - E_U)/n$ , where  $E_S$  and  $E_U$  are the total energy of strained and unstrained heterostructure, respectively, and  $n$  indicates the atom number in the supercell. Fig. S2 exhibits the relationship of the strain energy  $E$  with the imposed biaxial strain. In the biaxial strain range of  $-4\% \sim 6\%$ , it is obviously that the strain energy shows a characteristic of a quadratic function, which indicates that the mechanical strain falls within the elastic limit range that the deformed structure can restore to its initial state when the mechanical strains are removed.

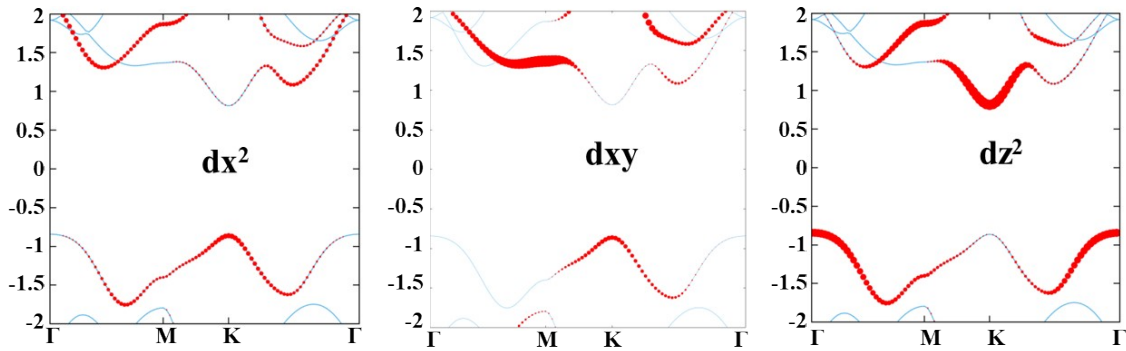

**FIG. S3.** The  $dx^2$ ,  $dxy$ ,  $dz^2$  orbitals band structures of MoS<sub>2</sub>.

Fig. S3 shows the  $dx^2$ ,  $dxy$ ,  $dz^2$  orbitals band structures of MoS<sub>2</sub>. It can be seen that the valence band minimum (VBM) of MoS<sub>2</sub> is located at the highly symmetric point K, which is contributed by the  $dz^2$  orbital. Relatively, the conduction band maximum (CBM) is relatively complex, the CBM originates from the competition between the conduction band at K point contributed by  $dx^2$  orbital, and the conduction band at  $\Gamma$  point contributed by  $dz^2$  orbital. For MoS<sub>2</sub> monolayer with direct bandgap, CBM and VBM are both located at K.

While after adsorbed on graphene, the interaction in the direction perpendicular to the horizontal plane from graphene will enhance the MoS<sub>2</sub> dz<sup>2</sup> orbit, so that the CBM at  $\Gamma$  assumes a leading position and the direct bandgap in MoS<sub>2</sub> transforms to indirect.

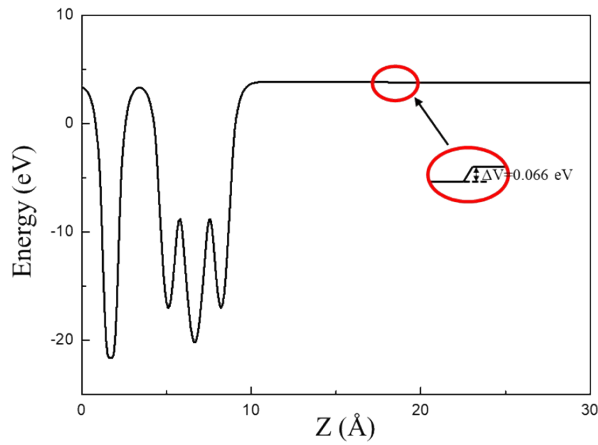

**FIG. S4.** The plane averaged electrostatic potentials of Gr-MoS<sub>2</sub> heterojunction along z-direction.

In Fig. S4, the average Coulomb potential for the Gr-MoS<sub>2</sub> system is shown. It can be seen that difference in work function in the case of Gr-MoS<sub>2</sub> and isolated graphene surface is defined as  $\Delta V = W_{Gr-MoS_2} - W_{Gr}$ , and it is about 0.066 eV. As  $\Delta V > 0$ , electrons will be transferred from graphene to MoS<sub>2</sub> surface, making the n-type contact.

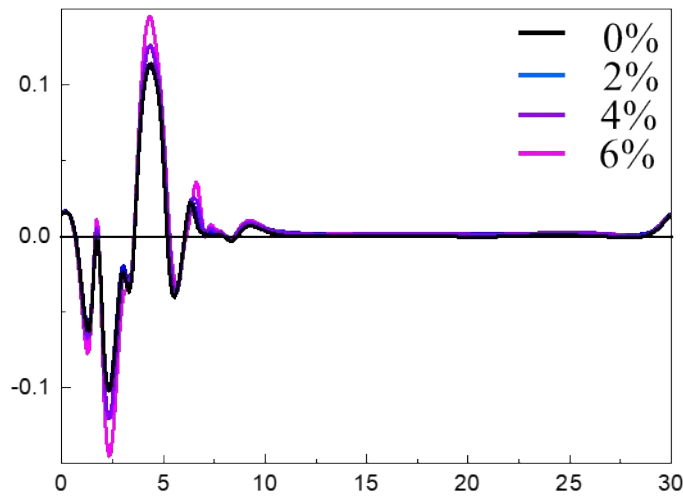

**FIG. S5.** Evolution of charge density differences under tensile strains.

Fig. S5 presents the charge density differences of Gr-MoS<sub>2</sub> bilayer under various in-plane tensile strains. It is clear that the electron redistribution mainly occurs within the strain. As mentioned, the electron accumulates and depletes on the side of MoS<sub>2</sub> and graphene layer, and it is observed that the degree of electron redistribution increases with increasing the strain, reaching a maximum value at 6%.

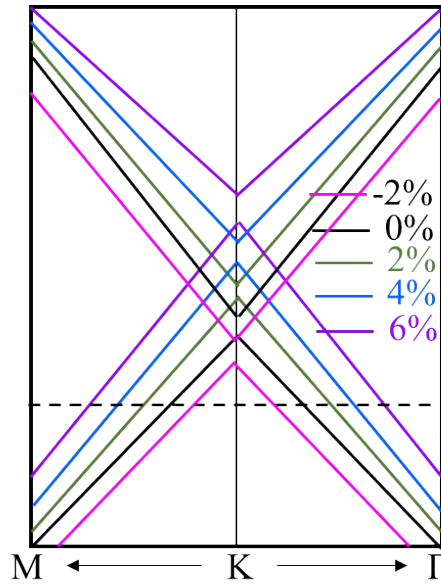

**FIG. S6.** Linear dispersion near the Fermi level at Dirac point of Gr-MoS<sub>2</sub> interface with tensile strain.

To describe the effect of the strain on the band gap of graphene in Gr-MoS<sub>2</sub> heterojunctions, in Fig. 6 we show the energy dispersion near the Fermi energy level at Dirac point for the VBM and the CBM in the band structures with different strain. As shown in Fig. S2, the total energy of Gr-MoS<sub>2</sub> junction is minimum at the equilibrium state of strain -2%, when graphene is subjected to the least external force. Therefore, for graphene, strain -2% is the most stable state. As mentioned above, the charge transfer from graphene to MoS<sub>2</sub>, moves the Fermi level down below the Dirac point, leading to the hole doping in graphene in the Gr-MoS<sub>2</sub> heterojunction.

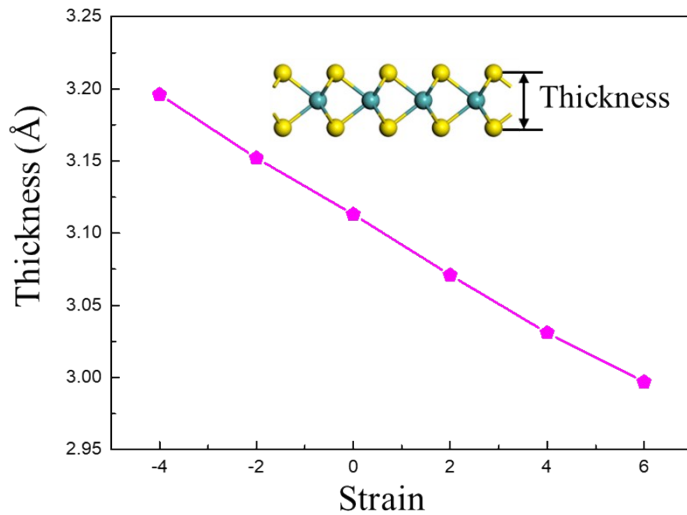

**FIG. S7.** The relationship of thickness of monolayer MoS<sub>2</sub> with the biaxial strains.

The thickness of layered MoS<sub>2</sub> changes with the application of strain, as shown in the Fig. S7. It can be seen that when compressive strain is applied, the thickness increases and Mo-S bond tends to the horizontal vertical direction, while when tensile strain is applied, its thickness decreases and Mo-S bond tends to the horizontal

direction. That is, the tensile strain in MoS<sub>2</sub> achieved by increasing lattice constant flattens the monolayer. Moreover, with tensile strain, the bond length of Mo-S is elongated, so that the ability of constraint valence electrons is weakened and then the band gap is reduced accordingly.
